# Supplementary figures and images for: Synthesis, X-ray crystal structure elucidation and Hirshfeld surface analysis of N-((4-(1H-benzo[d]imidazole-2-yl)phenyl)carbamothioyl)benzamide: investigations for elastase inhibition, antioxidant and DNA binding potentials for biological applications
Source: Royal Society of Chemistry journal article supplement (doi:10.1039/d0ra02501a), 2020-01-01

## Supplementary material

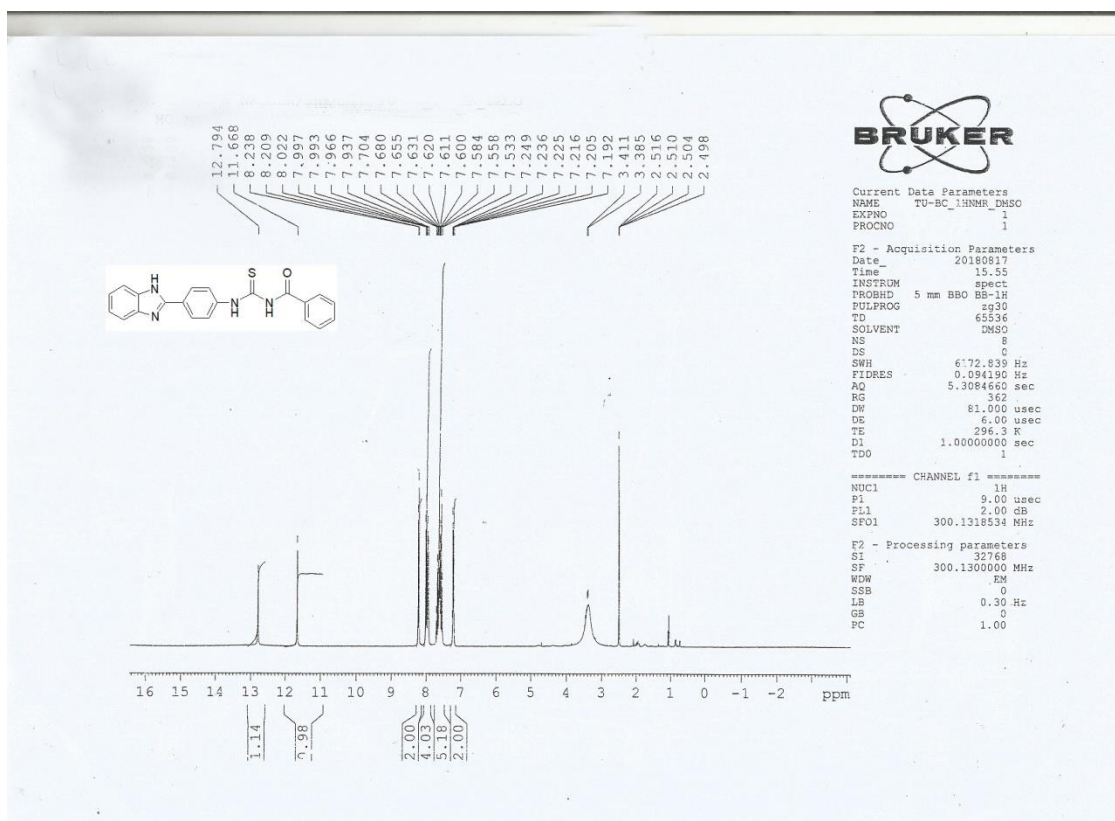

**Fig. S1.**  $^1\text{H}$  NMR spectrum of TUBC.

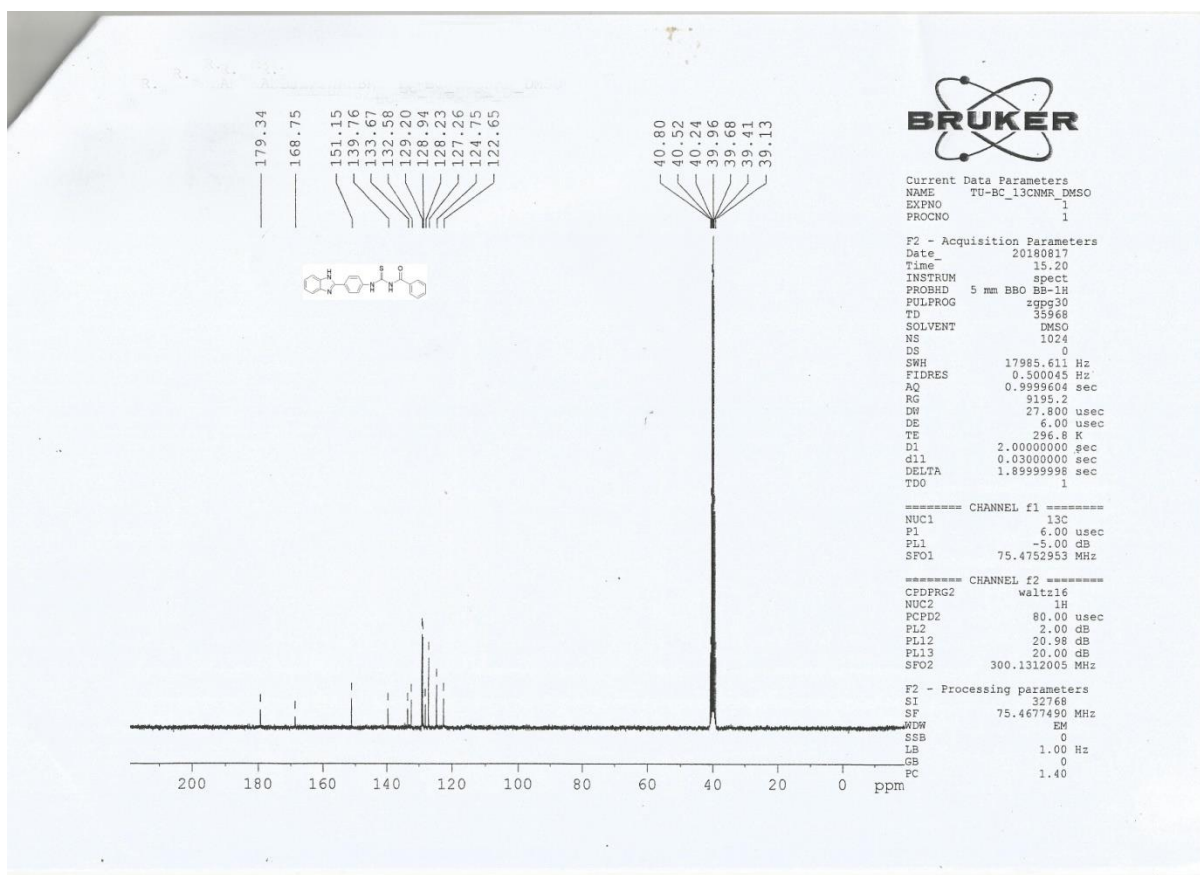

**Fig. S2.**  $^{13}\text{C}$  NMR spectrum of TUBC.

Supplement: d0ra02501a1.pdf [file d0ra02501a1.pdf]
